# Supplementary material
Source: PubMed Central journal article supplement (PMC6005454)
Supplement: supp_RA117.001425_134626_2_supp_125003_p7p555.pdf [file supp_RA117.001425_134626_2_supp_125003_p7p555.pdf]

## **SUPPORTING INFORMATION**

### **Title:**

The dimerization site-2 of the bacterial DNA-binding protein H-NS is required for gene silencing and stiffened nucleoprotein filament formation

### **Authors:**

Yuki Yamanaka, Rickson S. Winardhi, Erika Yamauchi, So-ichiro Nishiyama, Yoshiyuki Sowa, Jie Yan, Ikuro Kawagishi, Akira Ishihama, and Kaneyoshi Yamamoto

### **List:**

Experimental procedures & References

Table S1

Table S2

Figure legends

Figure S1

Figure S2

Figure S3

Figure S4

### **Experimental procedures:**

*Western blotting analysis*—*E. coli* cells grown in LB medium were harvested by centrifugation and re-suspended in 0.4 ml lysis buffer containing 8 M urea and sonicated. After centrifugation, the same volume of supernatant was subjected to 18% SDS-PAGE with prestained protein marker (Nacalai Tesque) and blotted on to PVDF membranes using an iBlot semi-dry transfer apparatus (Invitrogen). Membranes were first immuno-detected with anti-H-NS serum (Shimada *et al.*, 2011) and HRP- conjugated anti-rabbit IgG (Nacalai Tesque) antibodies and then developed with a chemiluminescence kit (Nacalai Tesque). The image was analyzed with a LAS-4000 IR multi colour imager (Fuji Film). Molecular marker

*Circular dichroism spectroscopy (CD)* —CD spectra of H-NS were measured using a J-820 spectropolarimeter (Jasco). The CD measurements were carried out in a wavelength range between 190 and 250 nm in a cell with a path length of 0.2 cm (volume 0.4 ml) at 25°C in the buffer (10 mM Tris-HCl pH 7.4 and 50 mM KCl). The spectra are the average of two or three independent measurements of each five scans recorded in 0.5 nm increments at a scan speed of 20 nm/min. The estimation of secondary structure content was performed using a Spectra Manager (Jasco).

*Electrophoretic mobility shift assay (EMSA)* —Probes were amplified by PCR using the pLUXslpp as a template, with a pair of primers: a specific primer and a FITC-labeled primer (Table S2). PCR products with FITC at their termini were purified using the QIAquick PCR purification kit (Qiagen). For EMSA, mixtures of the FITC-labeled probes and purified each H-NS protein were incubated at room temperature for 15 min in the binding buffer (10 mM Tris-HCl pH 7.4 and 50 mM KCl). After addition of a DNA dye solution, the mixture was directly subjected to 7% PAGE. Fluorescent-labeled DNA in gels was detected using LAS-4000 (Fuji Film).

*Structured-illumination microscopy (SIM)* — A single colony of a strain carrying an *hns*-expressing plasmid was grown overnight at 37°C with reciprocal shaking. The overnight culture was diluted 100-fold into the medium containing 10 µM IPTG to express *lac*-inducible H-NS. Transformants were grown to OD<sub>600</sub> ~0.5 at 37°C with shaking and were fixed with 1.5% PFA for 30 mins. Cells were pelleted and washed twice with PBS. Permeabilization was done using 0.1% Triton X100 for 30 mins, followed by pelleting and washing twice with PBS. After treatment of DAPI (10 µg/ml) for 15 min, the cells were pelleted and washed twice with PBS. Imaging was performed using structured-illumination microscopy (SIM) on a W1 spinning Disk microscope (CSU-W1 Nikon, Japan) combined with the Live-SR system (Roper scientific) as followed by Gao *et al.*, 2017.

### **References:**

- Burton, N. A., Johnson, M. D., Antczak, P., Robinson, A., and Lund, P. A. (2010) Novel aspects of the acid response network of *E. coli* K-12 are revealed by a study of transcriptional dynamics. *J. Mol. Biol.*, 401, 726-742.
- Gao Y., Foo Y. H., Winardhi R. S., Tang Q., Yan J., and Kenney L. J. (2017) Charged residues in the H-NS linker drive DNA binding and gene silencing in single cells. *Proc. Natl. Acad. Sci.*, 114, 12560-12565.
- Jishage, M. and Ishihama, A. (1997) Variation in RNA polymerase sigma subunit composition within different stocks of *Escherichia coli* strain W3110. *J. Bacteriol.*, 179, 959-963.
- Louis-Jeune, C., Andrade-Navarro, M. A., and Perez-Iratxeta, C. (2012) Prediction of protein secondary structure from circular dichroism using theoretically derived spectra. *Proteins*, 80, 374-381.

- Shimada, T., Bridier, A., Briandet, R., and Ishihama, A. (2011) Novel roles of LeuO in transcription regulation in *E. coli*: Antagonistic interplay with the universal silencer H-NS. *Mol. Microbiol.*, 82, 376-397.
- Ueda, T., Takahashi, H., Uyar, E., Ogasawara, N., and Oshima, T. (2013) Functions of the Hha and YdgT proteins in transcriptional silencing by the nucleoid proteins, H-NS and StpA, in *Escherichia coli*. *DNA Res.*, 20, 263-271.
- Yamanaka, Y., Oshima, T., Ishihama, A., and Yamamoto, K. (2014) Characterization of the YdeO regulon in *Escherichia coli*. *PLoS ONE*, 9, e111962.

Table S1. Deconvolution of the circular dichroism data

| Protein        | $\alpha$ -helix (%) |
|----------------|---------------------|
| H-NS           | 92.37               |
| H-NS-C21S      | 92.37               |
| H-NS-C21S-I70C | 91.90               |
| H-NS-I70A      | 92.37               |

The values were calculated using K2D3 (Gao et al., 2012).

Table S2. Bacterial strains, plasmids, and oligonucleotides used in this study.

| Name                             | Characterization                                                                                | Reference                   |
|----------------------------------|-------------------------------------------------------------------------------------------------|-----------------------------|
| <b><i>E. coli</i> strain</b>     |                                                                                                 |                             |
| W3110 typeA                      | Wild type, complete $\sigma$ set                                                                | Jishage & Ishihama, 1997    |
| W3110 $\Delta$ hns               | W3110, $\Delta$ <i>hns</i>                                                                      | Ueda <i>et al.</i> , 2013   |
| W3110 $\Delta$ hha               | W3110, $\Delta$ <i>hha</i>                                                                      | Ueda <i>et al.</i> , 2013   |
| W3110 $\Delta$ ydgT              | W3110, $\Delta$ <i>ydgT</i>                                                                     | Ueda <i>et al.</i> , 2013   |
| W3110 $\Delta$ hha $\Delta$ ydgT | W3110, $\Delta$ <i>hha</i> , $\Delta$ <i>ydgT</i>                                               | Ueda <i>et al.</i> , 2013   |
| <b>Plasmid</b>                   |                                                                                                 |                             |
| pLUX                             | promoter-less <i>luxCDABE</i>                                                                   | Burton <i>et al.</i> , 2010 |
| pQE80L                           | T5 promoter, 6xHis                                                                              | Qiagen                      |
| pLUXslpp                         | pLUX, <i>slp'</i> - <i>lux</i>                                                                  | Burton <i>et al.</i> , 2010 |
| pQE80Lhns                        | pQE80L, <i>hns</i>                                                                              | Provided by T. Oshima       |
| pQE80LhnsN1                      | pQE80L, truncated <i>hns</i> encoding residues 47-137                                           | This study                  |
| pQE80Lhns-C21S                   | <i>hns</i> gene with a substitution of Cys21Ser on pQE80Lhns                                    | This study                  |
| pQE80Lhns-C21S -S2C              | <i>hns</i> gene with substitutions of Ser2Cys and Cys21Ser derived from pQE80Lhns-C21S          | This study                  |
| pQE80Lhns-C21S -E3C              | <i>hns</i> gene with substitutions of Glu3Cys and $\delta$ Cys21Ser derived from pQE80Lhns-C21S | This study                  |
| pQE80Lhns-C21S -A4C              | <i>hns</i> gene with substitutions of Ala4Cys and Cys21Ser derived from pQE80Lhns-C21S          | This study                  |
| pQE80Lhns-C21S -L5C              | <i>hns</i> gene with substitutions of Leu5Cys and Cys21Ser derived from pQE80Lhns-C21S          | This study                  |
| pQE80Lhns-C21S -K6C              | <i>hns</i> gene with substitutions of Lys6Cys and $\delta$ Xys21Ser derived from pQE80Lhns-C21S | This study                  |
| pQE80Lhns-C21S -I7C              | <i>hns</i> gene with substitutions of Ile7Cys and Cys21Ser derived from pQE80Lhns-C21S          | This study                  |
| pQE80Lhns-C21S -L8C              | <i>hns</i> gene with substitutions of Leu8Cys and Cys21Ser derived from pQE80Lhns-C21S          | This study                  |
| pQE80Lhns-C21S -N9C              | <i>hns</i> gene with substitutions of Asn9Cys and Cys21Ser derived from pQE80Lhns-C21S          | This study                  |
| pQE80Lhns-C21S -N10C             | <i>hns</i> gene with substitutions of Asn10Cys and Cys21Ser derived from pQE80Lhns-C21S         | This study                  |
| pQE80Lhns-C21S -I11C             | <i>hns</i> gene with substitutions of Ile11Cys and Cys21Ser derived from pQE80Lhns-C21S         | This study                  |

|                      |                                                                                         |            |
|----------------------|-----------------------------------------------------------------------------------------|------------|
| pQE80Lhns-C21S -R12C | <i>hns</i> gene with substitutions of Arg12Cys and Cys21Ser derived from pQE80Lhns-C21S | This study |
| pQE80Lhns-C21S -T13C | <i>hns</i> gene with substitutions of Thr13Cys and Cys21Ser derived from pQE80Lhns-C21S | This study |
| pQE80Lhns-C21S -L14C | <i>hns</i> gene with substitutions of Leu14Cys and Cys21Ser derived from pQE80Lhns-C21S | This study |
| pQE80Lhns-C21S -R15C | <i>hns</i> gene with substitutions of Arg15Cys and Cys21Ser derived from pQE80Lhns-C21S | This study |
| pQE80Lhns-C21S -A16C | <i>hns</i> gene with substitutions of Ala16Cys and Cys21Ser derived from pQE80Lhns-C21S | This study |
| pQE80Lhns-C21S -Q17C | <i>hns</i> gene with substitutions of Gln17Cys and Cys21Ser derived from pQE80Lhns-C21S | This study |
| pQE80Lhns-C21S -R19C | <i>hns</i> gene with substitutions of Arg19Cys and Cys21Ser derived from pQE80Lhns-C21S | This study |
| pQE80Lhns-C21S -E20C | <i>hns</i> gene with substitutions of Glu20Cys and Cys21Ser derived from pQE80Lhns-C21S | This study |
| pQE80Lhns-C21S -T22C | <i>hns</i> gene with substitutions of Thr22Cys and Cys21Ser derived from pQE80Lhns-C21S | This study |
| pQE80Lhns-C21S -L23C | <i>hns</i> gene with substitutions of Leu23Cys and Cys21Ser derived from pQE80Lhns-C21S | This study |
| pQE80Lhns-C21S -E24C | <i>hns</i> gene with substitutions of Glu24Cys and Cys21Ser derived from pQE80Lhns-C21S | This study |
| pQE80Lhns-C21S -T25C | <i>hns</i> gene with substitutions of Thr25Cys and Cys21Ser derived from pQE80Lhns-C21S | This study |
| pQE80Lhns-C21S -L26C | <i>hns</i> gene with substitutions of Leu26Cys and Cys21Ser derived from pQE80Lhns-C21S | This study |
| pQE80Lhns-C21S -E27C | <i>hns</i> gene with substitutions of Glu27Cys and Cys21Ser derived from pQE80Lhns-C21S | This study |
| pQE80Lhns-C21S -E28C | <i>hns</i> gene with substitutions of Glu28Cys and Cys21Ser derived from pQE80Lhns-C21S | This study |
| pQE80Lhns-C21S -M29C | <i>hns</i> gene with substitutions of Met29Cys and Cys21Ser derived from pQE80Lhns-C21S | This study |
| pQE80Lhns-C21S -L30C | <i>hns</i> gene with substitutions of Leu30Cys and Cys21Ser derived from pQE80Lhns-C21S | This study |
| pQE80Lhns-C21S -E31C | <i>hns</i> gene with substitutions of Glu31Cys and Cys21Ser derived from pQE80Lhns-C21S | This study |
| pQE80Lhns-C21S -K32C | <i>hns</i> gene with substitutions of Lys32Cys and Cys21Ser derived from pQE80Lhns-C21S | This study |
| pQE80Lhns-C21S -L33C | <i>hns</i> gene with substitutions of Leu33Cys and Cys21Ser derived from pQE80Lhns-C21S | This study |
| pQE80Lhns-C21S -E34C | <i>hns</i> gene with substitutions of Glu34Cys and Cys21Ser derived from pQE80Lhns-C21S | This study |
| pQE80Lhns-C21S -V35C | <i>hns</i> gene with substitutions of Val35Cys and Cys21Ser derived from pQE80Lhns-C21S | This study |
| pQE80Lhns-C21S -V36C | <i>hns</i> gene with substitutions of Val36Cys and Cys21Ser derived from pQE80Lhns-C21S | This study |
| pQE80Lhns-C21S -V37C | <i>hns</i> gene with substitutions of Val37Cys and Cys21Ser derived from pQE80Lhns-C21S | This study |
| pQE80Lhns-C21S -N38C | <i>hns</i> gene with substitutions of Asn38Cys and Cys21Ser derived from pQE80Lhns-C21S | This study |
| pQE80Lhns-C21S -E39C | <i>hns</i> gene with substitutions of Glu39Cys and Cys21Ser derived from pQE80Lhns-C21S | This study |

|                      |                                                                                         |            |
|----------------------|-----------------------------------------------------------------------------------------|------------|
| pQE80Lhns-C21S -R40C | <i>hns</i> gene with substitutions of Arg40Cys and Cys21Ser derived from pQE80Lhns-C21S | This study |
| pQE80Lhns-C21S -R41C | <i>hns</i> gene with substitutions of Arg41Cys and Cys21Ser derived from pQE80Lhns-C21S | This study |
| pQE80Lhns-C21S -E42C | <i>hns</i> gene with substitutions of Glu42Cys and Cys21Ser derived from pQE80Lhns-C21S | This study |
| pQE80Lhns-C21S -E43C | <i>hns</i> gene with substitutions of Glu43Cys and Cys21Ser derived from pQE80Lhns-C21S | This study |
| pQE80Lhns-C21S -E44C | <i>hns</i> gene with substitutions of Glu44Cys and Cys21Ser derived from pQE80Lhns-C21S | This study |
| pQE80Lhns-C21S -S45C | <i>hns</i> gene with substitutions of Ser45Cys and Cys21Ser derived from pQE80Lhns-C21S | This study |
| pQE80Lhns-C21S -A46C | <i>hns</i> gene with substitutions of Ala46Cys and Cys21Ser derived from pQE80Lhns-C21S | This study |
| pQE80Lhns-C21S -A47C | <i>hns</i> gene with substitutions of Ala47Cys and Cys21Ser derived from pQE80Lhns-C21S | This study |
| pQE80Lhns-C21S -A48C | <i>hns</i> gene with substitutions of Ala48Cys and Cys21Ser derived from pQE80Lhns-C21S | This study |
| pQE80Lhns-C21S -A49C | <i>hns</i> gene with substitutions of Ala49Cys and Cys21Ser derived from pQE80Lhns-C21S | This study |
| pQE80Lhns-C21S -E50C | <i>hns</i> gene with substitutions of Glu50Cys and Cys21Ser derived from pQE80Lhns-C21S | This study |
| pQE80Lhns-C21S -V51C | <i>hns</i> gene with substitutions of Val51Cys and Cys21Ser derived from pQE80Lhns-C21S | This study |
| pQE80Lhns-C21S -E52C | <i>hns</i> gene with substitutions of Glu52Cys and Cys21Ser derived from pQE80Lhns-C21S | This study |
| pQE80Lhns-C21S -E53C | <i>hns</i> gene with substitutions of Glu53Cys and Cys21Ser derived from pQE80Lhns-C21S | This study |
| pQE80Lhns-C21S -R54C | <i>hns</i> gene with substitutions of Arg54Cys and Cys21Ser derived from pQE80Lhns-C21S | This study |
| pQE80Lhns-C21S -T55C | <i>hns</i> gene with substitutions of Thr55Cys and Cys21Ser derived from pQE80Lhns-C21S | This study |
| pQE80Lhns-C21S -R56C | <i>hns</i> gene with substitutions of Arg56Cys and Cys21Ser derived from pQE80Lhns-C21S | This study |
| pQE80Lhns-C21S -K57C | <i>hns</i> gene with substitutions of Lys57Cys and Cys21Ser derived from pQE80Lhns-C21S | This study |
| pQE80Lhns-C21S -L58C | <i>hns</i> gene with substitutions of Leu58Cys and Cys21Ser derived from pQE80Lhns-C21S | This study |
| pQE80Lhns-C21S -Q59C | <i>hns</i> gene with substitutions of Gln59Cys and Cys21Ser derived from pQE80Lhns-C21S | This study |
| pQE80Lhns-C21S -Q60C | <i>hns</i> gene with substitutions of Gln60Cys and Cys21Ser derived from pQE80Lhns-C21S | This study |
| pQE80Lhns-C21S -Y61C | <i>hns</i> gene with substitutions of Tyr61Cys and Cys21Ser derived from pQE80Lhns-C21S | This study |
| pQE80Lhns-C21S -R62C | <i>hns</i> gene with substitutions of Arg62Cys and Cys21Ser derived from pQE80Lhns-C21S | This study |
| pQE80Lhns-C21S -E63C | <i>hns</i> gene with substitutions of Glu63Cys and Cys21Ser derived from pQE80Lhns-C21S | This study |
| pQE80Lhns-C21S -M64C | <i>hns</i> gene with substitutions of Met64Cys and Cys21Ser derived from pQE80Lhns-C21S | This study |
| pQE80Lhns-C21S -L65C | <i>hns</i> gene with substitutions of Leu65Cys and Cys21Ser derived from pQE80Lhns-C21S | This study |

|                      |                                                                                         |            |
|----------------------|-----------------------------------------------------------------------------------------|------------|
| pQE80Lhns-C21S -I66C | <i>hns</i> gene with substitutions of Ile66Cys and Cys21Ser derived from pQE80Lhns-C21S | This study |
| pQE80Lhns-C21S -A67C | <i>hns</i> gene with substitutions of Ala67Cys and Cys21Ser derived from pQE80Lhns-C21S | This study |
| pQE80Lhns-C21S -D68C | <i>hns</i> gene with substitutions of Asp68Cys and Cys21Ser derived from pQE80Lhns-C21S | This study |
| pQE80Lhns-C21S -G69C | <i>hns</i> gene with substitutions of Gly69Cys and Cys21Ser derived from pQE80Lhns-C21S | This study |
| pQE80Lhns-C21S -I70C | <i>hns</i> gene with substitutions of Ile70Cys and Cys21Ser derived from pQE80Lhns-C21S | This study |
| pQE80Lhns-C21S -D71C | <i>hns</i> gene with substitutions of Asp71Cys and Cys21Ser derived from pQE80Lhns-C21S | This study |
| pQE80Lhns-C21S -P72C | <i>hns</i> gene with substitutions of Pro72Cys and Cys21Ser derived from pQE80Lhns-C21S | This study |
| pQE80Lhns-C21S -N73C | <i>hns</i> gene with substitutions of Asn73Cys and Cys21Ser derived from pQE80Lhns-C21S | This study |
| pQE80Lhns-C21S -E74C | <i>hns</i> gene with substitutions of Glu74Cys and Cys21Ser derived from pQE80Lhns-C21S | This study |
| pQE80Lhns-C21S -L75C | <i>hns</i> gene with substitutions of Leu75Cys and Cys21Ser derived from pQE80Lhns-C21S | This study |
| pQE80Lhns-C21S -L76C | <i>hns</i> gene with substitutions of Leu76Cys and Cys21Ser derived from pQE80Lhns-C21S | This study |
| pQE80Lhns-C21S -N77C | <i>hns</i> gene with substitutions of Asn77Cys and Cys21Ser derived from pQE80Lhns-C21S | This study |
| pQE80Lhns-C21S -S78C | <i>hns</i> gene with substitutions of Ser78Cys and Cys21Ser derived from pQE80Lhns-C21S | This study |
| pQE80Lhns-C21S -L79C | <i>hns</i> gene with substitutions of Leu79Cys and Cys21Ser derived from pQE80Lhns-C21S | This study |
| pQE80Lhns-C21S -A80C | <i>hns</i> gene with substitutions of Ala80Cys and Cys21Ser derived from pQE80Lhns-C21S | This study |
| pQE80Lhns-C21S -A81C | <i>hns</i> gene with substitutions of Ala81Cys and Cys21Ser derived from pQE80Lhns-C21S | This study |
| pQE80Lhns-C21S -V82C | <i>hns</i> gene with substitutions of Val82Cys and Cys21Ser derived from pQE80Lhns-C21S | This study |
| pQE80Lhns-C21S -K83C | <i>hns</i> gene with substitutions of Lys83Cys and Cys21Ser derived from pQE80Lhns-C21S | This study |
| pQE80Lhns-C21S -S84C | <i>hns</i> gene with substitutions of Ser84Cys and Cys21Ser derived from pQE80Lhns-C21S | This study |
| pQE80Lhns-C21S -G85C | <i>hns</i> gene with substitutions of Gly85Cys and Cys21Ser derived from pQE80Lhns-C21S | This study |
| pQE80Lhns-C21S -T86C | <i>hns</i> gene with substitutions of Thr86Cys and Cys21Ser derived from pQE80Lhns-C21S | This study |
| pQE80Lhns-C21S -K87C | <i>hns</i> gene with substitutions of Lys87Cys and Cys21Ser derived from pQE80Lhns-C21S | This study |
| pQE80Lhns-C21S -A88C | <i>hns</i> gene with substitutions of Ala88Cys and Cys21Ser derived from pQE80Lhns-C21S | This study |
| pQE80Lhns-C21S -K89C | <i>hns</i> gene with substitutions of Lys89Cys and Cys21Ser derived from pQE80Lhns-C21S | This study |
| pQE80Lhns-C21S -R90C | <i>hns</i> gene with substitutions of Arg90Cys and Cys21Ser derived from pQE80Lhns-C21S | This study |
| pQE80Lhns-C21S -A91C | <i>hns</i> gene with substitutions of Ala91Cys and Cys21Ser derived from pQE80Lhns-C21S | This study |



|                       |                                                                                          |            |
|-----------------------|------------------------------------------------------------------------------------------|------------|
| pQE80Lhns-C21S -Q92C  | <i>hns</i> gene with substitutions of Gln92Cys and Cys21Ser derived from pQE80Lhns-C21S  | This study |
| pQE80Lhns-C21S -R93C  | <i>hns</i> gene with substitutions of Arg93Cys and Cys21Ser derived from pQE80Lhns-C21S  | This study |
| pQE80Lhns-C21S -P94C  | <i>hns</i> gene with substitutions of Pro94Cys and Cys21Ser derived from pQE80Lhns-C21S  | This study |
| pQE80Lhns-C21S -A95C  | <i>hns</i> gene with substitutions of Ala95Cys and Cys21Ser derived from pQE80Lhns-C21S  | This study |
| pQE80Lhns-C21S -K96C  | <i>hns</i> gene with substitutions of Lys96Cys and Cys21Ser derived from pQE80Lhns-C21S  | This study |
| pQE80Lhns-C21S -Y97C  | <i>hns</i> gene with substitutions of Tyr97Cys and Cys21Ser derived from pQE80Lhns-C21S  | This study |
| pQE80Lhns-C21S -S98C  | <i>hns</i> gene with substitutions of Ser98Cys and Cys21Ser derived from pQE80Lhns-C21S  | This study |
| pQE80Lhns-C21S -Y99C  | <i>hns</i> gene with substitutions of Tyr99Cys and Cys21Ser derived from pQE80Lhns-C21S  | This study |
| pQE80Lhns-C21S -V100C | <i>hns</i> gene with substitutions of Val100Cys and Cys21Ser derived from pQE80Lhns-C21S | This study |
| pQE80Lhns-C21S -D101C | <i>hns</i> gene with substitutions of Val101Cys and Cys21Ser derived from pQE80Lhns-C21S | This study |
| pQE80Lhns-C21S -E102C | <i>hns</i> gene with substitutions of Asp102Cys and Cys21Ser derived from pQE80Lhns-C21S | This study |
| pQE80Lhns-C21S -N103C | <i>hns</i> gene with substitutions of Asn103Cys and Cys21Ser derived from pQE80Lhns-C21S | This study |
| pQE80Lhns-C21S -G104C | <i>hns</i> gene with substitutions of Gly104Cys and Cys21Ser derived from pQE80Lhns-C21S | This study |
| pQE80Lhns-C21S -E105C | <i>hns</i> gene with substitutions of Glu105Cys and Cys21Ser derived from pQE80Lhns-C21S | This study |
| pQE80Lhns-C21S -T106C | <i>hns</i> gene with substitutions of Thr106Cys and Cys21Ser derived from pQE80Lhns-C21S | This study |
| pQE80Lhns-C21S -K107C | <i>hns</i> gene with substitutions of Lys107Cys and Cys21Ser derived from pQE80Lhns-C21S | This study |
| pQE80Lhns-C21S -T108C | <i>hns</i> gene with substitutions of Thr108Cys and Cys21Ser derived from pQE80Lhns-C21S | This study |
| pQE80Lhns-C21S -W109C | <i>hns</i> gene with substitutions of Trp109Cys and Cys21Ser derived from pQE80Lhns-C21S | This study |
| pQE80Lhns-C21S -T110C | <i>hns</i> gene with substitutions of Thr110Cys and Cys21Ser derived from pQE80Lhns-C21S | This study |
| pQE80Lhns-C21S -G111C | <i>hns</i> gene with substitutions of Gly111Cys and Cys21Ser derived from pQE80Lhns-C21S | This study |
| pQE80Lhns-C21S -Q112C | <i>hns</i> gene with substitutions of Gln112Cys and Cys21Ser derived from pQE80Lhns-C21S | This study |
| pQE80Lhns-C21S -G113C | <i>hns</i> gene with substitutions of Gly113Cys and Cys21Ser derived from pQE80Lhns-C21S | This study |
| pQE80Lhns-C21S -R114C | <i>hns</i> gene with substitutions of Arg114Cys and Cys21Ser derived from pQE80Lhns-C21S | This study |
| pQE80Lhns-C21S -T115C | <i>hns</i> gene with substitutions of Thr115Cys and Cys21Ser derived from pQE80Lhns-C21S | This study |
| pQE80Lhns-C21S -P116C | <i>hns</i> gene with substitutions of Pro116Cys and Cys21Ser derived from pQE80Lhns-C21S | This study |
| pQE80Lhns-C21S -A117C | <i>hns</i> gene with substitutions of Ala117Cys and Cys21Ser derived from pQE80Lhns-C21S | This study |

|                       |                                                                                          |            |
|-----------------------|------------------------------------------------------------------------------------------|------------|
| pQE80Lhns-C21S -V118C | <i>hns</i> gene with substitutions of Val118Cys and Cys21Ser derived from pQE80Lhns-C21S | This study |
| pQE80Lhns-C21S -I119C | <i>hns</i> gene with substitutions of Ile119Cys and Cys21Ser derived from pQE80Lhns-C21S | This study |
| pQE80Lhns-C21S -K120C | <i>hns</i> gene with substitutions of Lys120Cys and Cys21Ser derived from pQE80Lhns-C21S | This study |
| pQE80Lhns-C21S -K121C | <i>hns</i> gene with substitutions of Lys121Cys and Cys21Ser derived from pQE80Lhns-C21S | This study |
| pQE80Lhns-C21S -A122C | <i>hns</i> gene with substitutions of Ala122Cys and Cys21Ser derived from pQE80Lhns-C21S | This study |
| pQE80Lhns-C21S -M123C | <i>hns</i> gene with substitutions of Met123Cys and Cys21Ser derived from pQE80Lhns-C21S | This study |
| pQE80Lhns-C21S -D124C | <i>hns</i> gene with substitutions of Asp124Cys and Cys21Ser derived from pQE80Lhns-C21S | This study |
| pQE80Lhns-C21S -E125C | <i>hns</i> gene with substitutions of Glu125Cys and Cys21Ser derived from pQE80Lhns-C21S | This study |
| pQE80Lhns-C21S -Q126C | <i>hns</i> gene with substitutions of Gln126Cys and Cys21Ser derived from pQE80Lhns-C21S | This study |
| pQE80Lhns-C21S -G127C | <i>hns</i> gene with substitutions of Gly127Cys and Cys21Ser derived from pQE80Lhns-C21S | This study |
| pQE80Lhns-C21S -K128C | <i>hns</i> gene with substitutions of Lys128Cys and Cys21Ser derived from pQE80Lhns-C21S | This study |
| pQE80Lhns-C21S -S129C | <i>hns</i> gene with substitutions of Ser129Cys and Cys21Ser derived from pQE80Lhns-C21S | This study |
| pQE80Lhns-C21S -L130C | <i>hns</i> gene with substitutions of Leu130Cys and Cys21Ser derived from pQE80Lhns-C21S | This study |
| pQE80Lhns-C21S -D131C | <i>hns</i> gene with substitutions of Asp131Cys and Cys21Ser derived from pQE80Lhns-C21S | This study |
| pQE80Lhns-C21S -D132C | <i>hns</i> gene with substitutions of Asp132Cys and Cys21Ser derived from pQE80Lhns-C21S | This study |
| pQE80Lhns-C21S -F133C | <i>hns</i> gene with substitutions of Phe133Cys and Cys21Ser derived from pQE80Lhns-C21S | This study |
| pQE80Lhns-C21S -L134C | <i>hns</i> gene with substitutions of Leu134Cys and Cys21Ser derived from pQE80Lhns-C21S | This study |
| pQE80Lhns-C21S -I135C | <i>hns</i> gene with substitutions of Ile135Cys and Cys21Ser derived from pQE80Lhns-C21S | This study |
| pQE80Lhns-C21S -K136C | <i>hns</i> gene with substitutions of Lys136Cys and Cys21Ser derived from pQE80Lhns-C21S | This study |
| pQE80Lhns-C21S -Q137C | <i>hns</i> gene with substitutions of Gln137Cys and Cys21Ser derived from pQE80Lhns-C21S | This study |

### Oligonucleotide

|              |                                    |                       |
|--------------|------------------------------------|-----------------------|
| Lux-R        | 5'-GGCAGGTAAACACTATTATCACC-3'      | Yamanaka et al., 2014 |
| Lux-R-FITC   | FITC-5'-GGCAGGTAAACACTATTATCACC-3' | Yamanaka et al., 2014 |
| pQE-promoter | 5'-CCCGAAAAGTGCCACCTG-3'           | This study            |
| pQE-reverse  | 5'-GTTCTGAGGTCATTACTGG-3'          | This study            |

|            |                                                                                |            |
|------------|--------------------------------------------------------------------------------|------------|
| hnsC21S-F  | 5'-GCGTTTCAAGTGTAGATTCTCTTGCCTGCG-3' (For substitution of Cys21Ser in H-NS)    | This study |
| hnsC21S-R2 | 5'-CGCAGGCAAGAGAATCTACACTTGAAACGC-3' (For substitution of Cys21Ser in H-NS)    | This study |
| hnsS2C-F   | 5'-CGGATCCGCATGCTGTGAAGCACTTAAAAT-3' (For substitution of Ser2Cys in H-NS)     | This study |
| hnsS2C-R   | 5'-ATTTTAAGTGCTTCACAGCATGCGGATCCG-3' (For substitution of Ser2Cys in H-NS)     | This study |
| hnsE3C-F   | 5'-ATCCGCATGCAGCTGTGCACTTAAAATTCT-3' (For substitution of Glu3Cys in H-NS)     | This study |
| hnsE3C-R   | 5'-AGAATTTTAAGTGCACAGCTGCATGCGGAT-3' (For substitution of Glu3Cys in H-NS)     | This study |
| hnsA4C-F   | 5'-CGCATGCAGCGAATGTCTTAAAATTCTGAA-3' (For substitution of Ala4Cys in H-NS)     | This study |
| hnsA4C-R   | 5'-TTCAGAATTTTAAGACATTCGCTGCATGCG-3' (For substitution of Ala4Cys in H-NS)     | This study |
| hnsL5C-F   | 5'-ATGCAGCGAAGCATGTAAAATTCTGAACAA-3' (For substitution of Leu5Cys in H-NS)     | This study |
| hns L5C-R  | 5'-TTGTTCAGAATTTTACATGCTTCGCTGCAT-3' (For substitution of Leu5Cys in H-NS)     | This study |
| hns K6C-F  | 5'-CAGCGAAGCACTTTGTATTCTGAACAACAT-3' (For substitution of Lys6Cys in H-NS)     | This study |
| hns K6C-R  | 5'-ATGTTGTTTCAGAATACAAAGTGCTTCGCTG-3' (For substitution of Lys6Cys in H-NS)    | This study |
| hns I7C-F  | 5'-CGAAGCACTTAAATGTCTGAACAACATCCG-3' (For substitution of Ile7Cys in H-NS)     | This study |
| hns I7C-R  | 5'-CGGATGTTGTTTCAGACATTTAAGTGCTTCG-3' (For substitution of Ile7Cys in H-NS)    | This study |
| hns L8C-F  | 5'-AGCACTTAAAATTTGTAACAACATCCGTAC-3' (For substitution of Leu8Cys in H-NS)     | This study |
| hns L8C-R  | 5'-GTACGGATGTTGTTACAAATTTAAGTGCT-3' (For substitution of Leu8Cys in H-NS)      | This study |
| hns N9C-F  | 5'-ACTTAAAATTCTGTGTAACATCCGTACTCT-3' (For substitution of Asn9Cys in H-NS)     | This study |
| hns N9C-R  | 5'-AGAGTACGGATGTTACACAGAATTTAAGT-3' (For substitution of Asn9Cys in H-NS)      | This study |
| hns N10C-F | 5'-TAAAATTCTGAACTGTATCCGTACTCTTCG-3' (For substitution of Asn10Cys in H-NS)    | This study |
| hns N10C-R | 5'-CGAAGAGTACGGATACAGTTCAGAATTTTA-3' (For substitution of Asn10Cys in H-NS)    | This study |
| hns I11C-F | 5'-AATTCTGAACAACACTGTCGTA CTCTTCGTGC-3' (For substitution of Ile11Cys in H-NS) | This study |
| hns I11C-R | 5'-GCACGAAGAGTACGACAGTTGTTTCAGAATT-3' (For substitution of Ile11Cys in H-NS)   | This study |
| hns R12C-F | 5'-TCTGAACAACATCTGTACTCTTCGTGCGCA-3' (For substitution of Arg12Cys in H-NS)    | This study |
| hns R12C-R | 5'-TGCGCACGAAGAGTACAGATGTTGTTTCAGA-3' (For substitution of Arg12Cys in H-NS)   | This study |
| hns T13C-F | 5'-GAACAACATCCGTTGTCTTCGTGCGCAGGC-3' (For substitution of Thr13Cys in H-NS)    | This study |
| hns T13C-R | 5'-GCCTGCGCACGAAGACAACGGATGTTGTTTC-3' (For substitution of Thr13Cys in H-NS)   | This study |

|              |                                                                             |            |
|--------------|-----------------------------------------------------------------------------|------------|
| hns L14C-F   | 5'-CAACATCCGTACTTGTTCGTGCGCAGGCAAG-3'(For substitution of Leu14Cys in H-NS) | This study |
| hns L14C-R   | 5'-CTTGCCTGCGCACGACAAGTACGGATGTTG-3'(For substitution of Leu14Cys in H-NS)  | This study |
| hns R15C-F_2 | 5'-CATCCGTACTCTTTGTGCGCAGGCAAGAGA-3'(For substitution of Arg15Cys in H-NS)  | This study |
| hns R15C-R_2 | 5'-TCTCTTGCCTGCGCACAAAGAGTACGGATG-3'(For substitution of Arg15Cys in H-NS)  | This study |
| hns A16C-F_2 | 5'-CCGTACTCTTCGTTGTCAGGCAAGAGAATC-3'(For substitution of Ala16Cys in H-NS)  | This study |
| hns A16C-R_2 | 5'-GATTCTCTTGCCTGACAACGAAGAGTACGG-3'(For substitution of Ala16Cys in H-NS)  | This study |
| hns Q17C-F_2 | 5'-TACTCTTCGTGCGTGTGCAAGAGAATCTAC-3'(For substitution of Gln17Cys in H-NS)  | This study |
| hns Q17C-R_2 | 5'-GTAGATTCTCTTGCACACGCACGAAGAGTA-3'(For substitution of Gln17Cys in H-NS)  | This study |
| hns A18C-F_2 | 5'-TCTTCGTGCGCAGTGTAGAGAATCTACACT-3'(For substitution of Ala18Cys in H-NS)  | This study |
| hns A18C-R_2 | 5'-AGTGTAGATTCTTACACTGCGCACGAAGA-3'(For substitution of Ala18Cys in H-NS)   | This study |
| hns R19C-F_2 | 5'-TCGTGCGCAGGCATGTGAATCTACACTTGA-3'(For substitution of Arg19Cys in H-NS)  | This study |
| hns R19C-R_2 | 5'-TCAAGTGTAGATTCACATGCCTGCGCACGA-3'(For substitution of Arg19Cys in H-NS)  | This study |
| hns E20C-F_2 | 5'-TGCGCAGGCAAGATGTTCTACACTTGAAAC-3'(For substitution of Glu20Cys in H-NS)  | This study |
| hns E20C-R_2 | 5'-GTTTCAAGTGTAGAACATCTTGCCTGCGCA-3'(For substitution of Glu20Cys in H-NS)  | This study |
| hns T22C-F_2 | 5'-GGCAAGAGAATCTTGTCTTGAAACGCTGGA-3'(For substitution of Thr22Cys in H-NS)  | This study |
| hns T22C-R_2 | 5'-TCCAGCGTTTCAAGACAAGATTCTCTTGCC-3'(For substitution of Thr22Cys in H-NS)  | This study |
| hns L23C-F_2 | 5'-AAGAGAATCTACATGTGAAACGCTGGAAG-3'A(For substitution of Leu23Cys in H-NS)  | This study |
| hns L23C-R_2 | 5'-TCTTCCAGCGTTTACATGTAGATTCTCTT-3'(For substitution of Leu23Cys in H-NS)   | This study |
| hns E24C-F_2 | 5'-AGAATCTACACTTTGTACGCTGGAAGAAAT-3'(For substitution of Glu24Cys in H-NS)  | This study |
| hns E24C-R_2 | 5'-ATTTCTTCCAGCGTACAAAGTGTAGATTCT-3'(For substitution of Glu24Cys in H-NS)  | This study |
| hns T25C-F_2 | 5'-ATCTACACTTGAATGTCTGGAAGAAATGCT-3'(For substitution of Thr25Cys in H-NS)  | This study |
| hns T25C-R_2 | 5'-AGCATTTCTTCCAGACATTCAAGTGTAGAT-3'(For substitution of Thr25Cys in H-NS)  | This study |
| hns L26C-F   | 5'-TACACTTGAAACGTGTGAAGAAATGCTGGA-3'(For substitution of Leu26Cys in H-NS)  | This study |
| hns L26C-R   | 5'-TCCAGCATTTCTTACACGTTTCAAGTGTA-3'(For substitution of Leu26Cys in H-NS)   | This study |
| hns E27C-F   | 5'-ACTTGAAACGCTGTGTGAAATGCTGGAAA-3'(For substitution of Glu27Cys in H-NS)   | This study |
| hns E27C-R   | 5'-TTTTCCAGCATTTACACAGCGTTTCAAGT-3'(For substitution of Glu27Cys in H-NS)   | This study |

|             |                                                                              |            |
|-------------|------------------------------------------------------------------------------|------------|
| hns E28C-F  | 5'-TGAAACGCTGGAATGTATGCTGGAAAAATT-3'(For substitution of Glu28Cys in H-NS)   | This study |
| hns E28C-R  | 5'-AATTTTTCCAGCATACATTCCAGCGTTTCA-3'(For substitution of Glu28Cys in H-NS)   | This study |
| hns M29C-F  | 5'-AACGCTGGAAGAATGTCTGGAAAAATTAGA-3'(For substitution of Met29Cys in H-NS)   | This study |
| hns M29C-R  | 5'-TCTAATTTTTCCAGACATTCTTCCAGCGTT-3'(For substitution of Met29Cys in H-NS)   | This study |
| hns L30C-F  | 5'-GCTGGAAGAAATGTGTGAAAAATTAGAAG-3'T(For substitution of Leu30Cys in H-NS)   | This study |
| hns L30C-R  | 5'-ACTTCTAATTTTTCACACATTTCTTCCAGC-3'(For substitution of Leu30Cys in H-NS)   | This study |
| hns E31C-F  | 5'-GGAAGAAATGCTGTGTAAATTAGAAGTTGT-3'(For substitution of Glu31Cys in H-NS)   | This study |
| hns E31C-R  | 5'-ACAACCTTCTAATTTACACAGCATTCTTCC-3'(For substitution of Glu31Cys in H-NS)   | This study |
| hns K32C-F  | 5'-AGAAATGCTGGAATGTTTAGAAGTTGTTGT-3'(For substitution of Lys32Cys in H-NS)   | This study |
| hns K32C-R  | 5'-ACAACAACCTTCTAAACATTCCAGCATTCT-3'(For substitution of Lys32Cys in H-NS)   | This study |
| hns L33C-F  | 5'-AATGCTGGAAAAATGTGAAGTTGTTGTTA-3'(For substitution of Leu33Cys in H-NS)    | This study |
| hns L33C-R  | 5'-TTAACAACAACCTTACATTTTTCCAGCATT-3'(For substitution of Leu33Cys in H-NS)   | This study |
| hns E34C-F  | 5'-GCTGGAAAAATTATGTGTTGTTGTTAACGA-3'(For substitution of Glu34Cys in H-NS)   | This study |
| hns E34C-R  | 5'-TCGTTAACAACAACACATAATTTTTCCAGC-3'(For substitution of Glu34Cys in H-NS)   | This study |
| hns V35C-F  | 5'-GGAAAAATTAGAATGTGTTGTTAACGAACG-3'(For substitution of Val35Cys in H-NS)   | This study |
| hns V35C-R  | 5'-CGTTCGTTAACAACACATTCTAATTTTTCC-3'(For substitution of Val35Cys in H-NS)   | This study |
| hns V36C-F  | 5'-AAAATTAGAAGTTTGTGTTAACGAACGT-3'(For substitution of Val36Cys in H-NS)     | This study |
| hns V36C-R  | 5'-ACGTTTCGTTAACACAAACTTCTAATTTT-3'(For substitution of Val36Cys in H-NS)    | This study |
| hns V37C-F  | 5'-ATTAGAAGTTGTTTGTAAACGAACGTCGCGA-3'(For substitution of Val37ys in H-NS)   | This study |
| hns V37C-R  | 5'-TCGCGACGTTTCGTTACAAACAACCTTCTAAT-3'(For substitution of Val37Cys in H-NS) | This study |
| hns N38C-F  | 5'-AGAAGTTGTTGTTTGTGAACGTCGCGAAGA-3'(For substitution of Asn38Cys in H-NS)   | This study |
| hns N38C-R  | 5'-TCTTCGCGACGTTTCAACAACAACCTTCT-3'(For substitution of Asn38Cys in H-NS)    | This study |
| hns E39C-F  | 5'-TTGTTGTTAACTGTCGTCGCGAAGAAGA-3'(For substitution of Glu39Cys in H-NS)     | This study |
| hns E39C-R  | 5'-TCTTCTTCGCGACGACAGTTAACAACAA-3'(For substitution of Glu39Cys in H-NS)     | This study |
| hns R40C-F  | 5'-TGTTGTTAACGAATGTTCGCGAAGAAGAAAG-3'(For substitution of Arg40Cys in H-NS)  | This study |
| hns R40C-R2 | 5'-CTTTCTTCTTCGCGACATTCGTTAACAACA-3'(For substitution of Arg40Cys in H-NS)   | This study |

|             |                                                                             |            |
|-------------|-----------------------------------------------------------------------------|------------|
| hns R41C-F  | 5'-TGTTAACGAACGTTGTGAAGAAGAAAGCG-3'(For substitution of Arg41Cys in H-NS)   | This study |
| hns R41C-R  | 5'-GCGCTTTCTTCTTCACAACGTTTCGTAAACA-3'(For substitution of Arg41Cys in H-NS) | This study |
| hns E42C-F  | 5'-TAACGAACGTCGCTGTGAAGAAGCGCGGC-3'(For substitution of Glu42Cys in H-NS)   | This study |
| hns E42C-R  | 5'-GCCGCGCTTTCTTCACAGCGACGTTTCGTAA-3'(For substitution of Glu42Cys in H-NS) | This study |
| hns E43C-F  | 5'-CGAACGTCGCGAATGTGAAAGCGCGGCTGC-3'(For substitution of Glu43Cys in H-NS)  | This study |
| hns E43C-R  | 5'-GCAGCCGCGCTTTCACATTCGCGACGTTTCG-3'(For substitution of Glu43Cys in H-NS) | This study |
| hns E44C-F  | 5'-AACGTCGCGAAGAATGTAGCGCGGCTGCTGC-3'(For substitution of Glu44Cys in H-NS) | This study |
| hns E44C-R  | 5'-GCAGCAGCCGCGCTACATTCTTCGCGACGTT-3'(For substitution of Glu44Cys in H-NS) | This study |
| hns S45C-F  | 5'-TCGCGAAGAAGAATGTGCGGCTGCTGCTGA-3'(For substitution of Ser45Cys in H-NS)  | This study |
| hns S45C-R  | 5'-TCAGCAGCAGCCGCACATTCTTCTTCGCGA-3'(For substitution of Ser45Cys in H-NS)  | This study |
| hns A46C-F  | 5'-CGAAGAAGAAAGCTGTGCTGCTGCTGAAGT-3'(For substitution of Ala46Cys in H-NS)  | This study |
| hns A46C-R  | 5'-ACTTCAGCAGCAGCACAGCTTCTTCTTCG-3'(For substitution of Ala46Cys in H-NS)   | This study |
| hns A47C-F2 | 5'-AGAAGAAGCGCGTGTGCTGCTGAAGTTG-3'(For substitution of Ala47Cys in H-NS)    | This study |
| hns A47C-R  | 5'-CAACTTCAGCAGCACACGCGCTTCTTCT-3'(For substitution of Ala47Cys in H-NS)    | This study |
| hns A48C-F  | 5'-AGAAAGCGCGGCTTGTGCTGAAGTTGAAGA-3'(For substitution of Ala48Cys in H-NS)  | This study |
| hns A48C-R  | 5'-TCTTCAACTTCAGCACAAGCCGCGCTTCT-3'(For substitution of Ala48Cys in H-NS)   | This study |
| hns A49C-F  | 5'-AAGCGCGGCTGCTTGTGAAGTTGAAGAG-3'(For substitution of Ala49Cys in H-NS)    | This study |
| hns A49C-R  | 5'-CTCTTCAACTTCACAAGCAGCCGCGCTT-3'(For substitution of Ala49Cys in H-NS)    | This study |
| hns E50C-F  | 5'-CGCGGCTGCTGCTTGTGTTGAAGAGCGCAC-3'(For substitution of Glu50Cys in H-NS)  | This study |
| hns E50C-R  | 5'-GTGCGCTCTTCAACACAAGCAGCAGCCGCG-3'(For substitution of Glu50Cys in H-NS)  | This study |
| hns V51C-F  | 5'-GGCTGCTGCTGAATGTGAAGAGCGCACTCG-3'(For substitution of Val51Cys in H-NS)  | This study |
| hns V51C-R  | 5'-CGAGTGCGCTCTTCACATTCAGCAGCAGCC-3'(For substitution of Val51Cys in H-NS)  | This study |
| hns E52C-F  | 5'-TGCTGCTGAAGTTTGTGAGCGCACTCGTAA-3'(For substitution of Glu52Cys in H-NS)  | This study |
| hns E52C-R  | 5'-TTACGAGTGCGCTCACAACTTCAGCAGCA-3'(For substitution of Glu52Cys in H-NS)   | This study |
| hns E53C-F  | 5'-TGCTGAAGTTGAATGTGCACTCGTAACT-3'(For substitution of Glu53Cys in H-NS)    | This study |
| hns E53C-R  | 5'-AGTTTACGAGTGCGACATTCAACTTCAGCA-3'(For substitution of Glu53Cys in H-NS)  | This study |

|            |                                                                              |            |
|------------|------------------------------------------------------------------------------|------------|
| hns R54C-F | 5'-TGAAGTTGAAGAGTGTACTCGTAAACTGCA-3'(For substitution of Arg54Cys in H-NS)   | This study |
| hns R54C-R | 5'-TGCAGTTTACGAGTACACTCTTCAACTTCA-3'(For substitution of Arg54Cys in H-NS)   | This study |
| hns T55C-F | 5'-AGTTGAAGAGCGCTGTCGTAAACTGCAGCA-3'(For substitution of Thr55Cys in H-NS)   | This study |
| hns T55C-R | 5'-TGCTGCAGTTTACGACAGCGCTCTTCAACT-3'(For substitution of Thr55Cys in H-NS)   | This study |
| hns R56C-F | 5'-TGAAGAGCGCACTTGTAAACTGCAGCAATA-3'(For substitution of Arg56Cys in H-NS)   | This study |
| hns R56C-R | 5'-TATTGCTGCAGTTTACAAGTGCCTCTTCA-3'(For substitution of Arg56Cys in H-NS)    | This study |
| hns K57C-F | 5'-AGAGCGCACTCGTTGTCTGCAGCAATATCG-3'(For substitution of Lys57Cys in H-NS)   | This study |
| hns K57C-R | 5'-CGATATTGCTGCAGACAACGAGTGCCTCT-3'(For substitution of Lys57Cys in H-NS)    | This study |
| hns L58C-F | 5'-GCGCACTCGTAAATGTCAGCAATATCGCGA-3'(For substitution of Leu58Cys in H-NS)   | This study |
| hns L58C-R | 5'-TCGCGATATTGCTGACATTTACGAGTGCGC-3'(For substitution of Leu58Cys in H-NS)   | This study |
| hns Q59C-F | 5'-CACTCGTAAACTGTGTCAATATCGCGAAAT-3'(For substitution of Gln59Cys in H-NS)   | This study |
| hns Q59C-R | 5'-ATTCGCGATATTGACACAGTTTACGAGTG-3'(For substitution of Gln59Cys in H-NS)    | This study |
| hns Q60C-F | 5'-TCGTAAACTGCAGTGTTATCGCGAAATGCT-3'(For substitution of Gln60Cys in H-NS)   | This study |
| hns Q60C-R | 5'-AGCATTTTCGCGATAACACTGCAGTTTACGA-3'(For substitution of Gln60Cys in H-NS)  | This study |
| hns Y61C-F | 5'-TAAACTGCAGCAATGTCGCGAAATGCTGAT-3'(For substitution of Tyr61Cys in H-NS)   | This study |
| hns Y61C-R | 5'-ATCAGCATTTTCGCGACATTGCTGCAGTTTA-3'(For substitution of Tyr61Cys in H-NS)  | This study |
| hns R62C-F | 5'-ACTGCAGCAATATTGTGAAATGCTGATCGC-3'(For substitution of Arg62Cys in H-NS)   | This study |
| hns R62C-R | 5'-GCGATCAGCATTTTACAATATTGCTGCAGT-3'(For substitution of Arg62Cys in H-NS)   | This study |
| hns E63C-F | 5'-GCAGCAATATCGCTGTATGCTGATCGCTGA-3'(For substitution of Glu63Cys in H-NS)   | This study |
| hns E63C-R | 5'-TCAGCGATCAGCATAACAGCGATATTGCTGC-3'(For substitution of Glu63Cys in H-NS)  | This study |
| hns M64C-F | 5'-GCAATATCGCGAATGTCTGATCGCTGACGG-3'(For substitution of Met64Cys in H-NS)   | This study |
| hns M64C-R | 5'-CCGTCAGCGATCAGACATTTCGCGATATTGC-3'(For substitution of Met64Cys in H-NS)  | This study |
| hns L65C-F | 5'-ATATCGCGAAATGTGTATCGCTGACGGTAT-3'(For substitution of Leu65Cys in H-NS)   | This study |
| hns L65C-R | 5'-ATACCGTCAGCGATAACACATTTTCGCGATAT-3'(For substitution of Leu65Cys in H-NS) | This study |
| hns I66C-F | 5'-TCGCGAAATGCTGTGTGCTGACGGTATTGA-3'(For substitution of Ile66Cys in H-NS)   | This study |
| hns I66C-R | 5'-TCAATACCGTCAGCACACAGCATTTTCGCGA-3'(For substitution of Ile66Cys in H-NS)  | This study |

|            |                                                                             |            |
|------------|-----------------------------------------------------------------------------|------------|
| hns A67C-F | 5'-CGAAATGCTGATCTGTGACGGTATTGACCC-3'(For substitution of Ala67Cys in H-NS)  | This study |
| hns A67C-R | 5'-GGGTCAATACCGTCACAGATCAGCATTTTCG-3'(For substitution of Ala67Cys in H-NS) | This study |
| hns D68C-F | 5'-AATGCTGATCGCTTGTGGTATTGACCCGAA-3'(For substitution of Asp68Cys in H-NS)  | This study |
| hns D68C-R | 5'-TTCGGGTCAATACCACAAGCGATCAGCATT-3'(For substitution of Asp68Cys in H-NS)  | This study |
| hns G69C-F | 5'-GCTGATCGCTGACTGTATTGACCCGAACGA-3'(For substitution of Gly69Cys in H-NS)  | This study |
| hns G69C-R | 5'-TCGTTTCGGGTCAATACAGTCAGCGATCAGC-3'(For substitution of Gly69Cys in H-NS) | This study |
| hns I70C-F | 5'-GATCGCTGACGGTTGTGACCCGAACGAACT-3'(For substitution of Ile70Cys in H-NS)  | This study |
| hns I70C-R | 5'-AGTTCGTTTCGGGTCACAACCGTCAGCGATC-3'(For substitution of Ile70Cys in H-NS) | This study |
| hns D71C-F | 5'-CGCTGACGGTATTTGTCCGAACGAACTGCT-3'(For substitution of Asp71Cys in H-NS)  | This study |
| hns D71C-R | 5'-AGCAGTTCGTTTCGGACAAATACCGTCAGCG-3'(For substitution of Asp71Cys in H-NS) | This study |
| hns P72C-F | 5'-TGACGGTATTGACTGTAACGAACTGCTGAA-3'(For substitution of Pro72Cys in H-NS)  | This study |
| hns P72C-R | 5'-TTCAGCAGTTCGTTACAGTCAATACCGTCA-3'(For substitution of Pro72Cys in H-NS)  | This study |
| hns N73C-F | 5'-CGGTATTGACCCGTGTGAACTGCTGAATAG-3'(For substitution of Asn73Cys in H-NS)  | This study |
| hns N73C-R | 5'-CTATTCAGCAGTTCACACGGGTCAATACCG-3'(For substitution of Asn73Cys in H-NS)  | This study |
| hns E74C-F | 5'-TATTGACCCGAACTGTCTGCTGAATAGCCT-3'(For substitution of Glu74Cys in H-NS)  | This study |
| hns E74C-R | 5'-AGGCTATTCAGCAGACAGTTCGGGTCAATA-3'(For substitution of Glu74Cys in H-NS)  | This study |
| hns L75C-F | 5'-TGACCCGAACGAATGTCTGAATAGCCTTGC-3'(For substitution of Leu75Cys in H-NS)  | This study |
| hns L75C-R | 5'-GCAAGGCTATTCAGACATTCGTTTCGGGTCA-3'(For substitution of Leu75Cys in H-NS) | This study |
| hns L76C-F | 5'-CCCGAACGAACTGTGTAATAGCCTTGCTGC-3'(For substitution of Leu76Cys in H-NS)  | This study |
| hns L76C-R | 5'-GCAGCAAGGCTATTACACAGTTCGTTTCGGG-3'(For substitution of Leu76Cys in H-NS) | This study |
| hns N77C-F | 5'-GAACGAACTGCTGTGTAGCCTTGCTGCCGT-3'(For substitution of Asn77Cys in H-NS)  | This study |
| hns N77C-R | 5'-ACGGCAGCAAGGCTACACAGCAGTTCGTTTC-3'(For substitution of Asn77Cys in H-NS) | This study |
| hns S78C-F | 5'-CGAACTGCTGAATTGTCTTGCTGCCGTAA-3'(For substitution of Ser78Cys in H-NS)   | This study |
| hns S78C-R | 5'-TTAACGGCAGCAAGACAATTCAGCAGTTCG-3'(For substitution of Ser78Cys in H-NS)  | This study |
| hns L79C-F | 5'-ACTGCTGAATAGCTGTGCTGCCGTAAATC-3'(For substitution of Leu79Cys in H-NS)   | This study |
| hns L79C-R | 5'-GATTTAACGGCAGCACAGCTATTCAGCAGT-3'(For substitution of Leu79Cys in H-NS)  | This study |



|            |                                                                             |            |
|------------|-----------------------------------------------------------------------------|------------|
| hns A80C-F | 5'-GCTGAATAGCCTTTGTGCCGTAAATCTGG-3'(For substitution of Ala80Cys in H-NS)   | This study |
| hns A80C-R | 5'-CCAGATTTAACGGCACAAAGGCTATTCAGC-3'(For substitution of Ala80Cys in H-NS)  | This study |
| hns A81C-F | 5'-GAATAGCCTTGCTTGTGTAAATCTGGCAC-3'(For substitution of Ala81Cys in H-NS)   | This study |
| hns A81C-R | 5'-GTGCCAGATTTAACACAAGCAAGGCTATTC-3'(For substitution of Ala81Cys in H-NS)  | This study |
| hns V82C-F | 5'-TAGCCTTGCTGCCTGTAAATCTGGCACCAA-3'(For substitution of Val82Cys in H-NS)  | This study |
| hns V82C-R | 5'-TTGGTGCCAGATTTACAGGCAGCAAGGCTA-3'(For substitution of Val82Cys in H-NS)  | This study |
| hns K83C-F | 5'-CCTTGCTGCCGTTTGTCTGGCACCAAAGC-3'(For substitution of Lys83Cys in H-NS)   | This study |
| hns K83C-R | 5'-GCTTTGGTGCCAGAACAACGGCAGCAAGG-3'(For substitution of Lys83Cys in H-NS)   | This study |
| hns S84C-F | 5'-TGCTGCCGTTAAATGTGGCACCAAAGCTAA-3'(For substitution of Ser84Cys in H-NS)  | This study |
| hns S84C-R | 5'-TTAGCTTTGGTGCCACATTTAACGGCAGCA-3'(For substitution of Ser84Cys in H-NS)  | This study |
| hns G85C-F | 5'-TGCCGTTAAATCTTGTACCAAAGCTAAACG-3'(For substitution of Gly85Cys in H-NS)  | This study |
| hns G85C-R | 5'-CGTTTAGCTTTGGTACAAGATTTAACGGCA-3'(For substitution of Gly85Cys in H-NS)  | This study |
| hns T86C-F | 5'-CGTTAAATCTGGCTGTAAAGCTAAACGTGC-3'(For substitution of Thr86Cys in H-NS)  | This study |
| hns T86C-R | 5'-GCACGTTTAGCTTTACAGCCAGATTTAACG-3'(For substitution of Thr86Cys in H-NS)  | This study |
| hns K87C-F | 5'-TAAATCTGGCACCTGTGCTAAACGTGCTCA-3'(For substitution of Lys87Cys in H-NS)  | This study |
| hns K87C-R | 5'-TGAGCACGTTTAGCACAGGTGCCAGATTTA-3'(For substitution of Lys87Cys in H-NS)  | This study |
| hns A88C-F | 5'-ATCTGGCACCAAATGTAAACGTGCTCAGCG-3'(For substitution of Ala88Cys in H-NS)  | This study |
| hns A88C-R | 5'-CGCTGAGCACGTTTACATTTGGTGCCAGAT-3'(For substitution of Ala88Cys in H-NS)  | This study |
| hns K89C-F | 5'-TGGCACCAAAGCTTGTCGTGCTCAGCGTCC-3'(For substitution of Lys89Cys in H-NS)  | This study |
| hns K89C-R | 5'-GGACGCTGAGCACGACAAGCTTTGGTGCCA-3'(For substitution of Lys89Cys in H-NS)  | This study |
| hns R90C-F | 5'-CACCAAAGCTAAATGTGCTCAGCGTCCGGC-3'(For substitution of Arg90Cys in H-NS)  | This study |
| hns R90C-R | 5'-GCCGGACGCTGAGCACATTTAGCTTTGGTG-3'(For substitution of Arg90Cys in H-NS)  | This study |
| hns A91C-F | 5'-CAAAGCTAAACGTTGTCAGCGTCCGGCAA-3'(For substitution of Ala91Cys in H-NS)   | This study |
| hns A91C-R | 5'-TTTGCCGGACGCTGACAACGTTTAGCTTTG-3'(For substitution of Ala91Cys in H-NS)  | This study |
| hns Q92C-F | 5'-AGCTAAACGTGCTTGTCTCGTCCGGCAAATA-3'(For substitution of Gln92Cys in H-NS) | This study |
| hns Q92C-R | 5'-TATTTTGCCGGACGACAAGCACGTTTAGCT-3'(For substitution of Gln92Cys in H-NS)  | This study |

|             |                                                                               |            |
|-------------|-------------------------------------------------------------------------------|------------|
| hns R93C-F  | 5'-TAAACGTGCTCAGTGTCCGGCAAATATAG-3'(For substitution of Arg93Cys in H-NS)     | This study |
| hns R93C-R  | 5'-CTATATTTTGCCGGACACTGAGCACGTTTA-3'(For substitution of Arg93Cys in H-NS)    | This study |
| hns P94C-F  | 5'-ACGTGCTCAGCGTTGTGCAAATATAGCTA-3'(For substitution of Pro94Cys in H-NS)     | This study |
| hns P94C-R  | 5'-TAGCTATATTTTGCACAACGCTGAGCACGT-3'(For substitution of Pro94Cys in H-NS)    | This study |
| hns A95C-F  | 5'-TGCTCAGCGTCCGTGTAAATATAGCTACGT-3'(For substitution of Ala95Cys in H-NS)    | This study |
| hns A95C-R  | 5'-ACGTAGCTATATTTACACGGACGCTGAGCA-3'(For substitution of Ala95Cys in H-NS)    | This study |
| hns K96C-F  | 5'-TCAGCGTCCGGCATGTTATAGCTACGTTGA-3'(For substitution of Lys96Cys in H-NS)    | This study |
| hns K96C-R  | 5'-TCAACGTAGCTATAACATGCCGGACGCTGA-3'(For substitution of Lys96Cys in H-NS)    | This study |
| hns Y97C-F  | 5'-GCGTCCGGCAAATGTAGCTACGTTGACGA-3'(For substitution of Tyr97Cys in H-NS)     | This study |
| hns Y97C-R  | 5'-TCGTCAACGTAGCTACATTTTGCCGGACGC-3'(For substitution of Tyr97Cys in H-NS)    | This study |
| hns S98C-F  | 5'-TCCGGCAAATATTGTTACGTTGACGAAA-3'(For substitution of Ser98Cys in H-NS)      | This study |
| hns S98C-R  | 5'-TTTTCGTCAACGTAACAATTTTGCCGGA-3'(For substitution of Ser98Cys in H-NS)      | This study |
| hns Y99C-F  | 5'-GGCAAATATAGCTGTGTTGACGAAAACGG-3'(For substitution of Tyr99Cys in H-NS)     | This study |
| hns Y99C-R  | 5'-CCGTTTTCGTCAACACAGCTATATTTTGCC-3'(For substitution of Tyr99Cys in H-NS)    | This study |
| hns V100C-F | 5'-AAAATATAGCTACTGTGACGAAAACGGCGA-3'(For substitution of Val100Cys in H-NS)   | This study |
| hns V100C-R | 5'-TCGCCGTTTTCGTCACAGTAGCTATATTTT-3'(For substitution of Val100Cys in H-NS)   | This study |
| hns D101C-F | 5'-ATATAGCTACGTTTGTGAAAACGGCGAAAC-3'(For substitution of Asp101Cys in H-NS)   | This study |
| hns D101C-R | 5'-GTTTCGCCGTTTTCACAAACGTAGCTATAT-3'(For substitution of Asp101Cys in H-NS)   | This study |
| hns E102C-F | 5'-TAGCTACGTTGACTGTAACGGCGAAACTAA-3'(For substitution of Glu102Cys in H-NS)   | This study |
| hns E102C-R | 5'-TTAGTTTTCGCCGTTACAGTCAACGTAGCTA-3'(For substitution of Glu102Cys in H-NS)  | This study |
| hns N103C-F | 5'-CTACGTTGACGAATGTGGCGAAACTAAAAC-3'(For substitution of Asn103Cys in H-NS)   | This study |
| hns N103C-R | 5'-GTTTTAGTTTTCGCCACATTCGTCAACGTAG-3'(For substitution of Asn103Cys in H-NS)  | This study |
| hns G104C-F | 5'-CGTTGACGAAAACGTGAAACTAAAACCTG-3'(For substitution of Gly104Cys in H-NS)    | This study |
| hns G104C-R | 5'-CAGGTTTTAGTTTTCACAGTTTTTCGTCAACG-3'(For substitution of Gly104Cys in H-NS) | This study |
| hns E105C-F | 5'-TGACGAAAACGGCTGTACTAAAACCTGGAC-3'(For substitution of Glu105Cys in H-NS)   | This study |
| hns E105C-R | 5'-GTCCAGGTTTTAGTACAGCCGTTTTTCGTCA-3'(For substitution of Glu105Cys in H-NS)  | This study |

|             |                                                                              |            |
|-------------|------------------------------------------------------------------------------|------------|
| hns T106C-F | 5'-CGAAAACGGCGAATGTAAAACCTGGACTG-3'G(For substitution of Thr106Cys in H-NS)  | This study |
| hns T106C-R | 5'-CCAGTCCAGGTTTTACATTCGCCGTTTTCG-3'(For substitution of Thr106Cys in H-NS)  | This study |
| hns K107C-F | 5'-AAACGGCGAAACTTGTACCTGGACTGGCCA-3'(For substitution of Lys107Cys in H-NS)  | This study |
| hns K107C-R | 5'-TGGCCAGTCCAGGTACAAGTTTCGCCGTTT-3'(For substitution of Lys107Cys in H-NS)  | This study |
| hns T108C-F | 5'-CGGCGAAACTAAATGTTGGACTGGCCAAGG-3'(For substitution of Thr108Cys in H-NS)  | This study |
| hns T108C-R | 5'-CCTTGGCCAGTCCAACATTTAGTTTCGCCG-3'(For substitution of Thr108Cys in H-NS)  | This study |
| hns W109C-F | 5'-CGAAACTAAAACCTGTACTGGCCAAGGCCG-3'(For substitution of Trp109Cys in H-NS)  | This study |
| hns W109C-R | 5'-CGGCCTTGGCCAGTACAGGTTTTAGTTTCG-3'(For substitution of Trp109Cys in H-NS)  | This study |
| hns T110C-F | 5'-AACTAAAACCTGGTGTGGCCAAGGCCGTAC-3'(For substitution of Thr110Cys in H-NS)  | This study |
| hns T110C-R | 5'-GTACGGCCTTGGCCACACCAGGTTTTAGTT-3'(For substitution of Thr110Cys in H-NS)  | This study |
| hns G111C-F | 5'-TAAAACCTGGACTTGTC AAGGCCGTACTCC-3'(For substitution of Gly111Cys in H-NS) | This study |
| hns G111C-R | 5'-GGAGTACGGCCTTGACAAGTCCAGGTTTTA-3'(For substitution of Gly111Cys in H-NS)  | This study |
| hns Q112C-F | 5'-AACCTGGACTGGCTGTGGCCGTACTCCAGC-3'(For substitution of Gln112Cys in H-NS)  | This study |
| hns Q112C-R | 5'-GCTGGAGTACGGCCACAGCCAGTCCAGGTT-3'(For substitution of Gln112Cys in H-NS)  | This study |
| hns G113C-F | 5'-CTGGACTGGCCAATGTCGTA CTCCAGCTGT-3'(For substitution of Gly113Cys in H-NS) | This study |
| hns G113C-R | 5'-ACAGCTGGAGTACGACATTGGCCAGTCCAG-3'(For substitution of Gly113Cys in H-NS)  | This study |
| hns R114C-F | 5'-GACTGGCCAAGGCTGTACTCCAGCTGTAAT-3'(For substitution of Arg114Cys in H-NS)  | This study |
| hns R114C-R | 5'-ATTACAGCTGGAGTACAGCCTTGGCCAGTC-3'(For substitution of Arg114Cys in H-NS)  | This study |
| hns T115C-F | 5'-TGGCCAAGGCCGTTGTCCAGCTGTAATCAA-3'(For substitution of Thr115Cys in H-NS)  | This study |
| hns T115C-R | 5'-TTGATTACAGCTGGACAACGGCCTTGGCCA-3'(For substitution of Thr115Cys in H-NS)  | This study |
| hns P116C-F | 5'-CCAAGGCCGTACTTGTGCTGTAATCAAAA-3'(For substitution of Pro116Cys in H-NS)   | This study |
| hns P116C-R | 5'-TTTTTGATTACAGCACAAGTACGGCCTTGG-3'(For substitution of Pro116Cys in H-NS)  | This study |
| hns A117C-F | 5'-AGGCCGTACTCCATGTGTAATCAAAAAGC-3'(For substitution of Ala117Cys in H-NS)   | This study |
| hns A117C-R | 5'-GCTTTTTTGATTACACATGGAGTACGGCCT-3'(For substitution of Ala117Cys in H-NS)  | This study |
| hns V118C-F | 5'-CCGTACTCCAGCTTGTATCAAAAAGCAAT-3'(For substitution of Val118Cys in H-NS)   | This study |
| hns V118C-R | 5'-ATTGCTTTTTTGATACAAGCTGGAGTACGG-3'(For substitution of Val118Cys in H-NS)  | This study |

|             |                                                                              |            |
|-------------|------------------------------------------------------------------------------|------------|
| hns I119C-F | 5'-TACTCCAGCTGTATGTAAAAAAGCAATGGA-3'(For substitution of Ile119Cys in H-NS)  | This study |
| hns I119C-R | 5'-TCCATTGCTTTTTTACATACAGCTGGAGTA-3'(For substitution of Ile119Cys in H-NS)  | This study |
| hns K120C-F | 5'-TCCAGCTGTAATCTGTAAAGCAATGGATGA-3'(For substitution of Lys120Cys in H-NS)  | This study |
| hns K120C-R | 5'-TCATCCATTGCTTTACAGATTACAGCTGGA-3'(For substitution of Lys120Cys in H-NS)  | This study |
| hns K121C-F | 5'-AGCTGTAATCAAATGTGCAATGGATGAGCA-3'(For substitution of Lys121Cys in H-NS)  | This study |
| hns K121C-R | 5'-TGCTCATCCATTGCACATTTGATTACAGCT-3'(For substitution of Lys121Cys in H-NS)  | This study |
| hns A122C-F | 5'-TGTAATCAAAAAATGTATGGATGAGCAAGG-3'(For substitution of Ala122Cys in H-NS)  | This study |
| hns A122C-R | 5'-CCTTGCTCATCCATACATTTTTTTGATTACA-3'(For substitution of Ala122Cys in H-NS) | This study |
| hns M123C-F | 5'-AATCAAAAAAGCATGTGATGAGCAAGGTAA-3'(For substitution of Met123Cys in H-NS)  | This study |
| hns M123C-R | 5'-TTACCTTGCTCATCACATGCTTTTTTTGATT-3'(For substitution of Met123Cys in H-NS) | This study |
| hns D124C-F | 5'-CAAAAAAGCAATGTGTGAGCAAGGTAAATC-3'(For substitution of Asp124Cys in H-NS)  | This study |
| hns D124C-R | 5'-GATTTACCTTGCTCACACATTGCTTTTTTG-3'(For substitution of Asp124Cys in H-NS)  | This study |
| hns E125C-F | 5'-AAAAGCAATGGATTGTCAAGGTAAATCCCT-3'(For substitution of Glu125Cys in H-NS)  | This study |
| hns E125C-R | 5'-AGGGATTTACCTTGACAATCCATTGCTTTT-3'(For substitution of Glu125Cys in H-NS)  | This study |
| hns Q126C-F | 5'-AGCAATGGATGAGTGTGGTAAATCCCTCGA-3'(For substitution of Gln126Cys in H-NS)  | This study |
| hns Q126C-R | 5'-TCGAGGGATTTACCACACTCATCCATTGCT-3'(For substitution of Gln126Cys in H-NS)  | This study |
| hns G127C-F | 5'-AATGGATGAGCAATGTAAATCCCTCGACGA-3'(For substitution of Gly127Cys in H-NS)  | This study |
| hns G127C-R | 5'-TCGTTCGAGGGATTTACATTGCTCATCCATT-3'(For substitution of Gly127Cys in H-NS) | This study |
| hns K128C-F | 5'-GGATGAGCAAGGTTGTTCCCTCGACGATTT-3'(For substitution of Lys128Cys in H-NS)  | This study |
| hns K128C-R | 5'-AAATCGTCGAGGGAACAACCTTGCTCATCC-3'(For substitution of Lys128Cys in H-NS)  | This study |
| hns S129C-F | 5'-TGAGCAAGGTAAATGTCTCGACGATTTCCCT-3'(For substitution of Ser129Cys in H-NS) | This study |
| hns S129C-R | 5'-AGGAAATCGTCGAGACATTTACCTTGCTCA-3'(For substitution of Ser129Cys in H-NS)  | This study |
| hns L130C-F | 5'-GCAAGGTAAATCCTGTGACGATTTCCCTGAT-3'(For substitution of Leu130Cys in H-NS) | This study |
| hns L130C-R | 5'-ATCAGGAAATCGTCACAGGATTTACCTTGC-3'(For substitution of Leu130Cys in H-NS)  | This study |
| hns D131C-F | 5'-AGGTAAATCCCTCTGTGATTTCCCTGATCAA-3'(For substitution of Asp131Cys in H-NS) | This study |
| hns D131C-R | 5'-TTGATCAGGAAATCACAGAGGGATTTACCT-3'(For substitution of Asp131Cys in H-NS)  | This study |

|             |                                                                             |            |
|-------------|-----------------------------------------------------------------------------|------------|
| hns D132C-F | 5'-TAAATCCCTCGACTGTTTCCTGATCAAGCA-3'(For substitution of Asp132Cys in H-NS) | This study |
| hns D132C-R | 5'-TGCTTGATCAGGAAACAGTCGAGGGATTTA-3'(For substitution of Asp132Cys in H-NS) | This study |
| hns F133C-F | 5'-ATCCCTCGACGATTGTCTGATCAAGCAATA-3'(For substitution of Phe133Cys in H-NS) | This study |
| hns F133C-R | 5'-TATTGCTTGATCAGACAATCGTCGAGGGAT-3'(For substitution of Phe133Cys in H-NS) | This study |
| hns L134C-F | 5'-CCTCGACGATTTCTGTATCAAGCAATAAGT-3'(For substitution of Leu134Cys in H-NS) | This study |
| hns L134C-R | 5'-ACTTATTGCTTGATACAGAAATCGTCGAGG-3'(For substitution of Leu134Cys in H-NS) | This study |
| hns I135C-F | 5'-CGACGATTCCTGTGTAAGCAATAAGTCGA-3'(For substitution of Ile135Cys in H-NS)  | This study |
| hns I135C-R | 5'-TCGACTTATTGCTTACACAGGAAATCGTCG-3'(For substitution of Ile135Cys in H-NS) | This study |
| hns K136C-F | 5'-CGATTCCTGATCTGTCAATAAGTCGACCT-3'(For substitution of Lys136Cys in H-NS)  | This study |
| hns K136C-R | 5'-AGGTCGACTTATTGACAGATCAGGAAATCG-3'(For substitution of Lys136Cys in H-NS) | This study |
| hns Q137C-F | 5'-TTTCCTGATCAAGTGTTAAGTCGACCTGCA-3'(For substitution of Gln137Cys in H-NS) | This study |
| hns Q137C-R | 5'-TGCAGGTCGACTTAACACTTGATCAGGAAA-3'(For substitution of Gln137Cys in H-NS) | This study |

---

**Figure legends:**

**FIGURE S1.** Whole cell extracts were prepared from overnight cultures of  $\Delta hns$  strains harbouring pQE80L (vector), pQE80Lhns (H-NS), pQE80Lhns $\Delta$ C-I70C (H-NS $\Delta$ C-I70C), and pQE80Lhns $\Delta$ C-L75C (H-NS $\Delta$ C-L75C). The cell extracts were subjected to Western blotting analysis against anti-H-NS and HRP-conjugated anti-rabbit IgG (Nacalai) antibodies. Arrow indicates the detected H-NS protein.

**FIGURE S2.** CD spectrum of H-NS in 10 mM Tris-HCl pH 7.4 and 50 mM KCl at 25°C. The CD measurements for 5  $\mu$ M H-NS, H-NS C21S, H-NS C21S I70C and H-NS I70A were carried out in a wavelength range between 190 and 250 nm.

**FIGURE S3.** (A) The level of H-NS-targeted promoter activity by H-NS I70A or L75A. We used the *lux* reporter system pLUXslpp. The promoter activity was calculated as described in EXPERIMENTAL PROCEDURES. (B) The level of H-NS-I70A and -L75A in cells as follow as Fig. S1.

**FIGURE S4.** Representative SIM images of bacterial cells stained with DAPI followed as Gao et al. (2017).

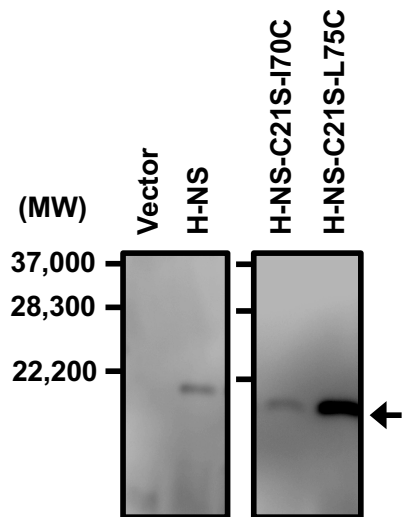

Yamanaka et al. (Supplemental Fig. S1)

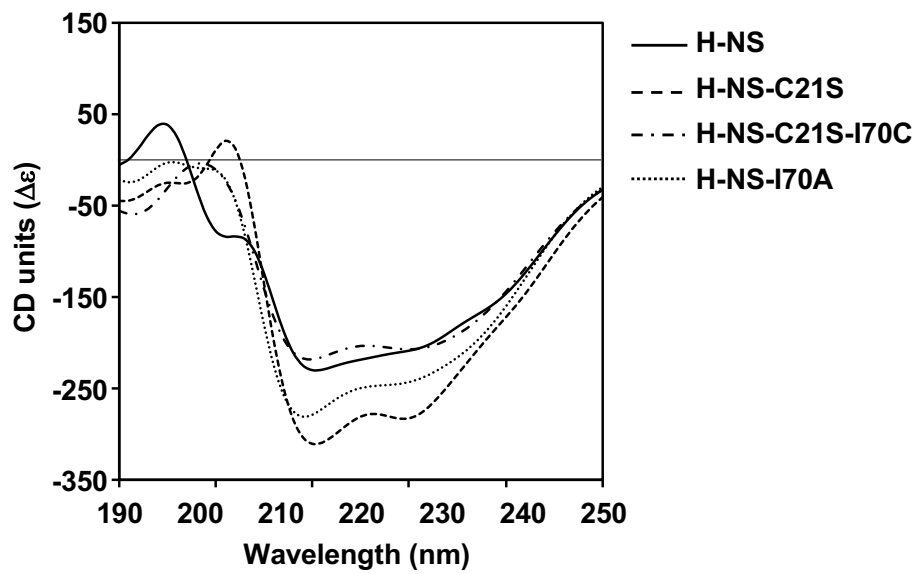

Yamanaka et al. (Supplemental Fig. S2)



**A**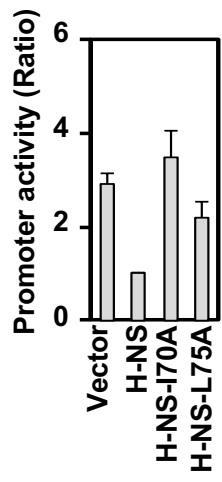**B**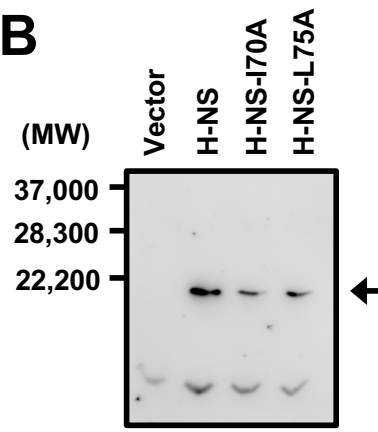

Yamanaka et al. (Supplemental Fig. S3)

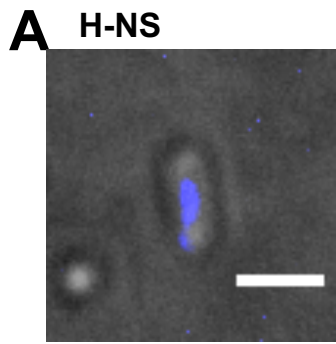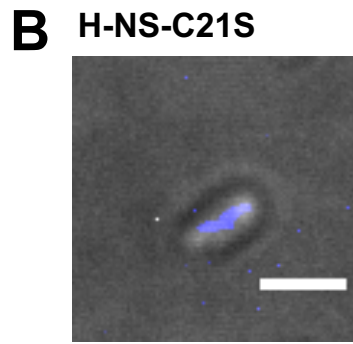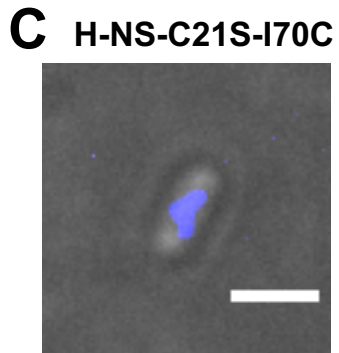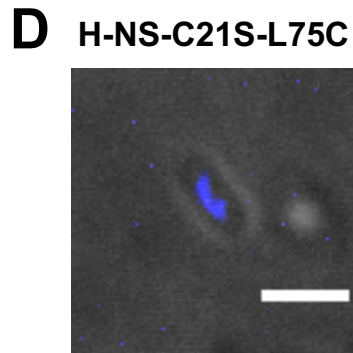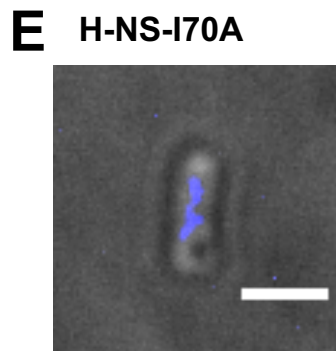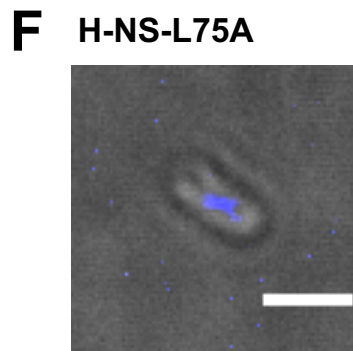

Yamanaka et al. (Supplemental Fig. S4)
